# Supplementary material
Source: MDPI journal article supplement (https://www.mdpi.com/2036-7449/14/1/4)
Supplement: s1 [file s1]

**Table S1. Number of isolated pathogens from each specimen in YCH, 2020.**

| specimens                | Total number of<br>specimens | Number of isolated<br>pathogens (%) |
|--------------------------|------------------------------|-------------------------------------|
| Blood                    | 2036                         | 281 (14)                            |
| Urine                    | 1074                         | 315 (29)                            |
| Wound and Pus            | 327                          | 203 (62)                            |
| CSF                      | 267                          | 13 (5)                              |
| Ear swab                 | 34                           | 22 (65)                             |
| Tracheal aspirate        | 92                           | 62 (67)                             |
| Intravenous Catheter tip | 68                           | 19 (28)                             |
| Eye swab                 | 30                           | 15 (50)                             |
| Throat swab              | 10                           | 0                                   |
| Sputum                   | 40                           | 19 (48)                             |
| Pleural fluid            | 11                           | 2 (18)                              |
| Peritoneal dialysis      | 27                           | 11 (41)                             |
| Tissue                   | 25                           | 13 (52)                             |
| Nasal swab               | 11                           | 5 (45)                              |
| Stool and Rectal swab    | 52                           | 28 (54)                             |
| Joint fluid              | 8                            | 1 (13)                              |
| Skin swab                | 4                            | 1 (25)                              |
| Ascitic fluid            | 4                            | 2 (50)                              |
| Vagina swab              | 5                            | 3 (60)                              |
| Bile                     | 3                            | 2 (67)                              |
| Drain                    | 3                            | 0                                   |
| VP shunt tip             | 1                            | 1 (100)                             |
| Pericardial fluid        | 1                            | 1 (100)                             |
| total                    | 4133                         | 1019 (25)                           |

**Table S2. Prevalence of bacterial species in each clinical ward.**

| clinical ward    | No. of isolates belonging to bacterial species |                   |                     |                |                 |                   |                                |                    |                      |                     |                  |      |                     |                      |       | Total   |
|------------------|------------------------------------------------|-------------------|---------------------|----------------|-----------------|-------------------|--------------------------------|--------------------|----------------------|---------------------|------------------|------|---------------------|----------------------|-------|---------|
|                  | <i>E.coli</i>                                  | <i>Klebsiella</i> | <i>Enterobacter</i> | <i>Proteus</i> | <i>Serratia</i> | <i>Salmonella</i> | Other <i>Enterobacteriales</i> | <i>Pseudomonas</i> | <i>Acinetobacter</i> | Other Non-fermenter | <i>S. aureus</i> | CoNS | <i>Enterococcus</i> | <i>Streptococcus</i> | Mould | Yeast & |
| Medical          | 66                                             | 41                | 8                   | 6              | 0               | 11                | 11                             | 16                 | 17                   | 14                  | 21               | 13   | 15                  | 5                    | 20    | 264     |
| Surgical         | 47                                             | 34                | 5                   | 1              | 1               | 0                 | 8                              | 29                 | 13                   | 15                  | 23               | 18   | 11                  | 3                    | 27    | 235     |
| Renal            | 10                                             | 7                 | 2                   | 2              | 1               | 0                 | 1                              | 8                  | 1                    | 5                   | 5                | 2    | 3                   | 0                    | 6     | 53      |
| Haemato-oncology | 15                                             | 4                 | 4                   | 0              | 0               | 0                 | 0                              | 4                  | 2                    | 5                   | 2                | 6    | 2                   | 1                    | 7     | 52      |
| Neonate          | 9                                              | 28                | 16                  | 0              | 5               | 0                 | 6                              | 5                  | 7                    | 9                   | 8                | 11   | 0                   | 4                    | 9     | 117     |
| Neuro            | 2                                              | 1                 | 0                   | 0              | 0               | 0                 | 0                              | 0                  | 0                    | 0                   | 0                | 0    | 1                   | 0                    | 0     | 4       |
| ICU              | 2                                              | 7                 | 0                   | 1              | 0               | 0                 | 0                              | 14                 | 10                   | 27                  | 2                | 0    | 0                   | 0                    | 6     | 69      |
| SICU             | 6                                              | 12                | 7                   | 0              | 13              | 0                 | 0                              | 8                  | 14                   | 22                  | 3                | 1    | 3                   | 0                    | 31    | 120     |
| Ortho            | 5                                              | 1                 | 1                   | 1              | 0               | 0                 | 1                              | 4                  | 1                    | 0                   | 56               | 3    | 1                   | 0                    | 0     | 74      |
| OPD              | 14                                             | 1                 | 2                   | 1              | 0               | 0                 | 2                              | 0                  | 1                    | 0                   | 3                | 1    | 3                   | 3                    | 0     | 31      |
| Total            | 176                                            | 136               | 45                  | 12             | 20              | 11                | 29                             | 88                 | 66                   | 97                  | 123              | 55   | 39                  | 16                   | 106   | 1019    |
